# Supplementary material
Source: PubMed Central journal article supplement (PMC3214103)
Supplement: legends.pdf [file legends.pdf]

## SUPPLEMENTARY FIGURE LEGENDS

**Supplementary Fig. 1. Effect of GalA-MRPs on Bz-insensitive NaCl CT responses in P and NP rats.** Shows representative CT responses in a NP rat and a P rat maintained on H<sub>2</sub>O (Group 2; Table 1) while their tongues were first stimulated with the rinse solution R and then with N+Bz+GalA-MRPs (0-1%). GalA-MRPs (0-1%) did not elicit a CT response in R (Katsumata et al. 2008). The CT responses were normalized to the mean tonic CT responses to 0.3 M NH<sub>4</sub>Cl obtained in each P and NP rat.

**Supplementary Fig. 2. Detection of TRPM5,  $\alpha$ -gustducin and TRPV1/TRPV1t in isolated taste buds and non-gustatory epithelium using RT-PCR.** cDNA made from C57BL/6J WT mice (Group 12; Table 1) fungiform taste buds (FF TBs), circumvallate taste buds (CV TBs) and the non-gustatory lingual epithelium devoid of taste buds (NG Epi) was screened for TRPM5 (**A**),  $\alpha$ -gustducin (**B**) and TRPV1 (**C**). All transcripts were found with bands of expected sizes (DNA ladder on *left* side in each panel) in the FF and CV taste buds but were not detected in the NG Epi. Negative (-) control was milliQ water. The cDNA from testis (T) was used as a positive control for TRPV1. In addition, cDNA from the isolated CT nerve was used as a negative control for TRPM5 (**A**) and  $\alpha$ -gustducin (data not shown). Beta-actin was found in all tissues (data not shown).

**Supplementary Fig. 3. T1R3 and TRPV1/TRPV1t protein levels in the intestinal mucosal cells in P and NP rats maintained on H<sub>2</sub>O.** The figure shows the data from Western blot experiments for T1R3 and TRPV1/TRPV1t in intestinal mucosal cells in 3

P rats and 3 NP rats maintained on H<sub>2</sub>O (Group 2; Table 1). The bars represent the density of T1R3 and TRPV1/TRPV1t bands computed relative to the density of  $\beta$ -actin. The p values represent the unpaired comparison between the two groups.

**Supplementary Fig. 4. Effects of chronic sucrose exposure on Bz-insensitive NaCl CT nerve responses in P and NP rats.** CT responses were measured while the rat tongue was stimulated with R and then with N+Bz+RTX ( $0-10 \times 10^{-6}$  M) in NP **(A)** or P **(B)** rats maintained on H<sub>2</sub>O ( $\circ$ ) (Group 2; Table 1) or exposed to chronic 5% sucrose ( $\blacktriangle$ ) in a no choice paradigm (Group 3; Table 1). In each animal the tonic CT response was normalized to the corresponding tonic CT responses obtained with 0.3 M NH<sub>4</sub>Cl. The zero RTX concentration is shown as -8.0 on the X-axis. The gray vertical bars represent points at RTX concentration in  $\mu$ M. The RTX-NaCl+Bz CT response relationship in naïve NP or P rats first shown in Figs. 3B ( $\circ$ ) and 4A ( $\circ$ ), respectively are also plotted for comparison.

**Supplementary Fig. 5. Effect of TRPV1t inhibition on Bz-insensitive NaCl CT responses.** CT responses were monitored in WT and TRPV1 KO mice (Group 12; Table 1) while the tongue was stimulated with the rinse solution R and then with N+Bz and N+Bz+TRPV1t agonist (0.25% GalA-MRPs,  $1 \times 10^{-6}$  M RTX or 30% ETOH). In each case the tonic CT responses were normalized to the corresponding tonic CT responses obtained with 0.3 M NH<sub>4</sub>Cl. Each bar represents the mean $\pm$ SEM values of the normalized tonic CT response from 3 mice.

**Supplementary Fig. 6. (A) Effect of U73122 on the CT responses to SC45647 in the absence and presence of ethanol.** CT responses were measured in SD rats while the rat tongue was first stimulated with the rinse solution R and then with R+0.005M SC45647 in the presence of 0 or 30% ETOH under control conditions (Control) and after topical lingual application of  $150 \times 10^{-6}$  M U73122 (Post-U73122). In 3 animals (Group 11; Table 1), in the presence of U73122 the tonic CT response to SC45647 was not different from the baseline ( $p > 0.05$ ) and also inhibited the further increase in the CT response in the presence of ETOH. **(B) Effect of BAPTA-AM loading on the CT response to sucrose in the absence or presence of ethanol.** CT responses were monitored in SD rats while their tongues were stimulated with a rinse solution and then with 0.5 M sucrose solution containing 0 or 30% ethanol (ETOH) before and after topical lingual application of  $33 \times 10^{-3}$  M BAPTA-AM (Table 2). In 3 animals (Group 11; Table 1), after BAPTA treatment, there was no statistical difference between the CT response to sucrose and sucrose+ETOH ( $p > 0.05$ ).
