# Supplementary material
Source: PubMed Central journal article supplement (PMC3214103)
Supplement: tableS1.pdf [file tableS1.pdf]

### Supplementary Table 1

**T1R3 and TRPV1/TRPV1t mRNA levels in the intestinal mucosal cells in P and NP rats**

| <b>mRNA</b>         | <b>NP rats+H<sub>2</sub>O<br/>(2<sup>-ΔCT</sup>)</b> | <b>P rats+H<sub>2</sub>O<br/>(2<sup>-ΔCT</sup>)</b> | <b>Fold<br/>change<br/>(P/NP)</b> | <b>p<br/>value</b> |
|---------------------|------------------------------------------------------|-----------------------------------------------------|-----------------------------------|--------------------|
| <b>T1R3</b>         | 0.498±0.123                                          | 3.686±0.891                                         | 7.41                              | 0.0076             |
| n                   | 5                                                    | 5                                                   |                                   |                    |
| <b>TRPV1/TRPV1t</b> | 0.00153±0.0004                                       | 0.00349±0.00054                                     | 2.28                              | 0.022              |
| n                   | 5                                                    | 5                                                   |                                   |                    |

The 2<sup>-ΔCT</sup> values are expressed as mean±SEM of n, where n represents the number of P and NP rats maintained on H<sub>2</sub>O (Group 2; Table 1) used for q-RTPCR studies.

The p values are unpaired comparison of mean±SEM of 2<sup>-ΔCT</sup> values of P and NP rats (Schmittgen and Livak 2008).
