# Supplementary material
Source: PubMed Central journal article supplement (PMC3214103)

NP rat (H<sub>2</sub>O)

P rat (H<sub>2</sub>O)

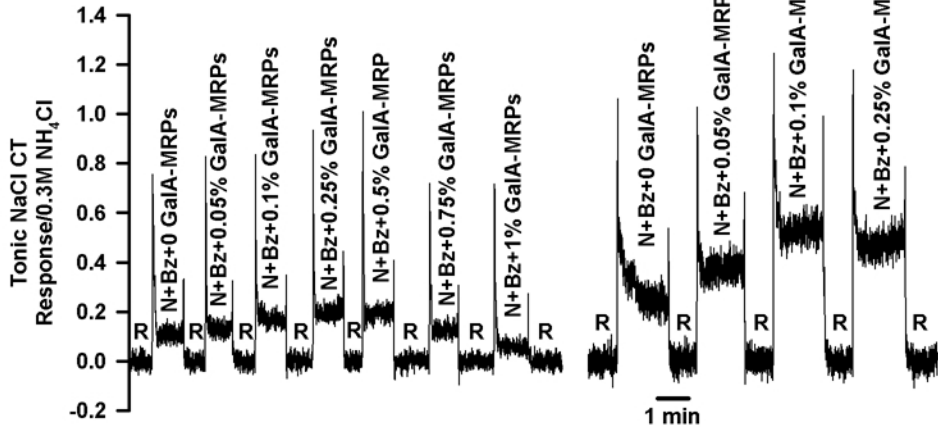

Supplement: figS1.pdf [file figS1.pdf]

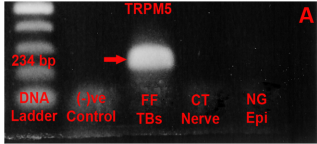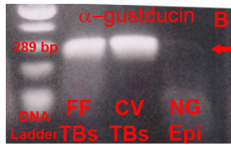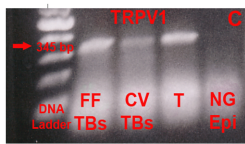

Supplement: figS2.pdf [file figS2.pdf]

## Intestinal mucosal cells

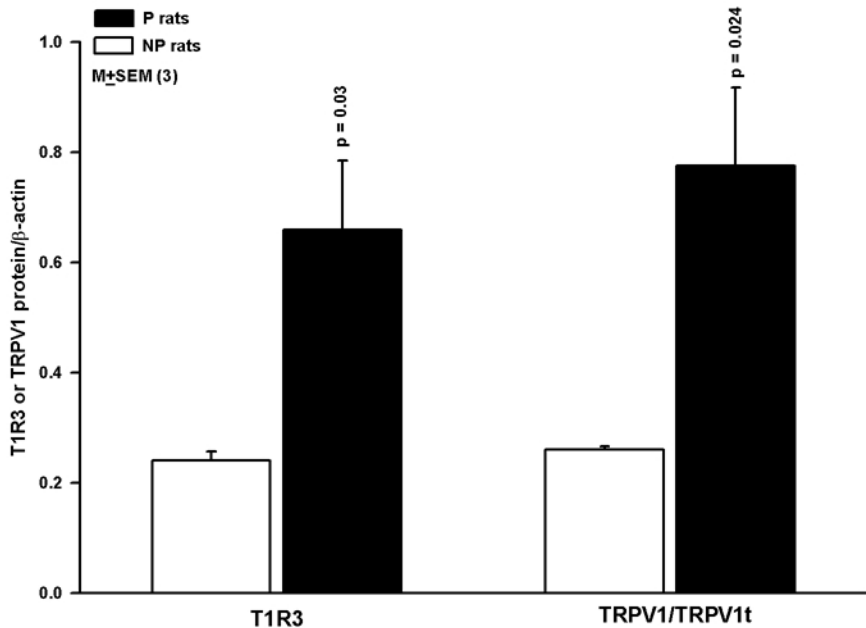

Supplement: figS3.pdf [file figS3.pdf]

A

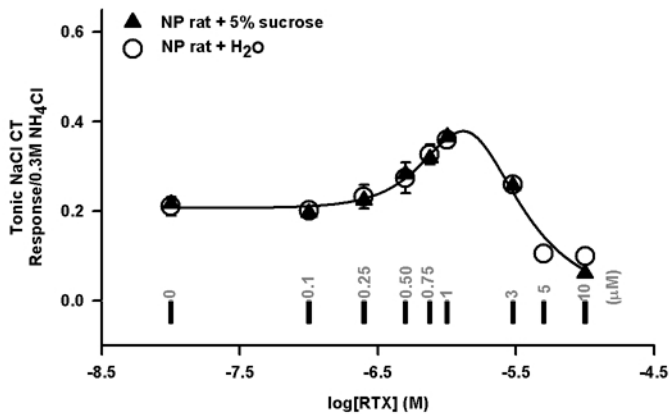

B

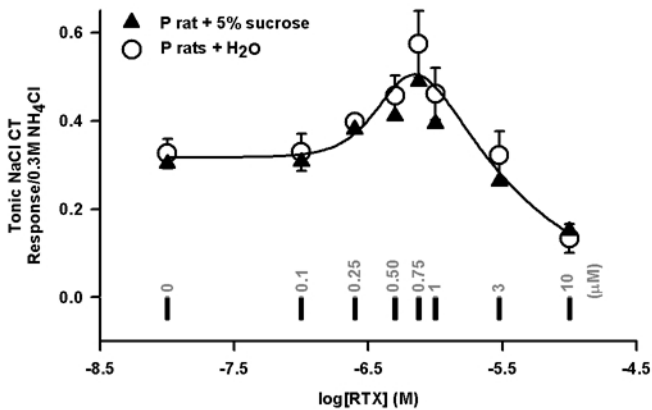

Supplement: figS4.pdf [file figS4.pdf]

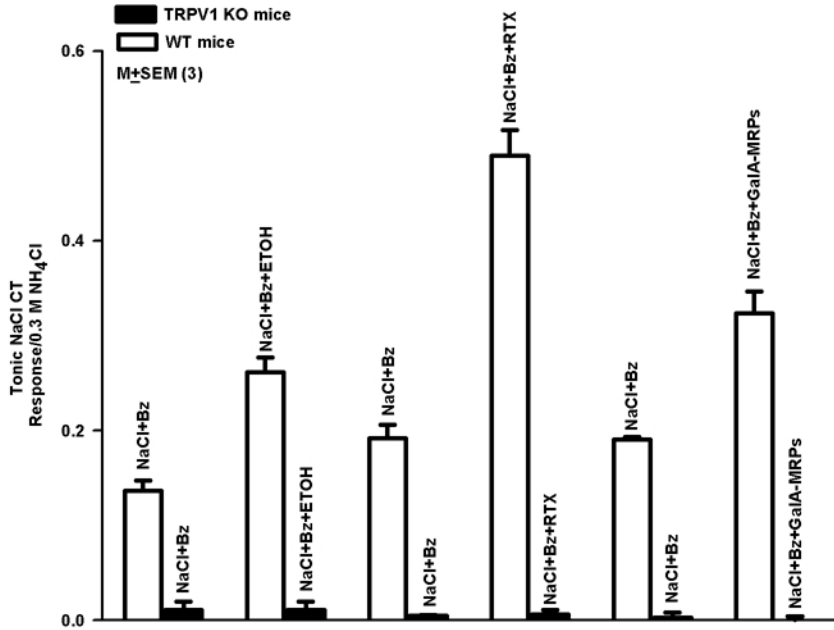

Supplement: figS5.pdf [file figS5.pdf]

**A****Control**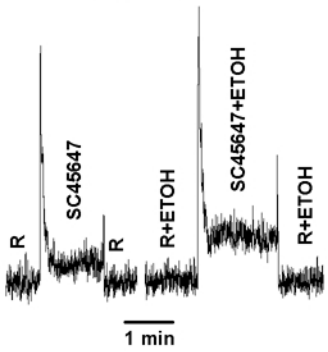**Post-U73122**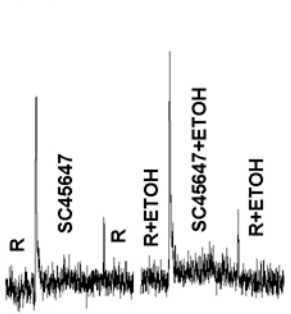**B****Control**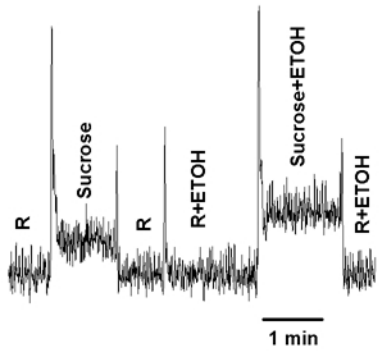**Post-BAPTA**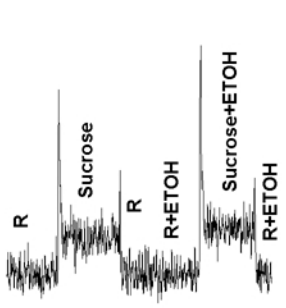

Supplement: figS6.pdf [file figS6.pdf]
